# Supplementary material for: The Effectiveness of Play Therapy on Anxiety, Pain, and Fatigue in Children with Cancer: A Systematic Review and Meta-Analysis
Source: Research Square preprint supplement (doi:10.21203/rs.3.rs-6762495/v1), 2025-08-25
Supplement: Supplementary file 1 [file 42bb2c436207bd83e978be2a.docx]

| **No** | **Author, year** | **Title of the study** | **References** | **Reasons for exclusion** |
| --- | --- | --- | --- | --- |
| 1 | Kanad, N., et al., 2024 | The effect of virtual reality on pain, fear and emotional appearance during blood draw in pediatric patients at the hematology-oncology outpatient clinic: A randomized controlled study | Kanad, N., Gerçeker, G. Ö., Eker, İ., & Susam, H. Ş. (2024). The effect of virtual reality on pain, fear and emotional appearance during blood draw in pediatric patients at the hematology-oncology outpatient clinic: A randomized controlled study. European Journal of Oncology Nursing, 68, 102495. | This study does not include play therapy but includes a one-time virtual reality-based therapeutic play intervention. |
| 2 | Masoud, A. E., et al., 2023 | Effectiveness of exergaming in reducing cancer-related fatigue among children with acute lymphoblastic leukemia: a randomized controlled trial | Masoud, A. E., Shaheen, A. A. M., Algabbani, M. F., AlEisa, E., & AlKofide, A. (2023). Effectiveness of exergaming in reducing cancer-related fatigue among children with acute lymphoblastic leukemia: a randomized controlled trial. Annals of medicine, 55(1), 2224048. | This study does not include play therapy but includes an exergaming based therapeutic play sessions intervention. |
| 3 | Günay, U., et al., 2022 | The Effects of the Activity of Making Jewelry From Beads on the Anxiety Levels of Children With Cancer: A Randomised Controlled Study | Günay, U., Sarman, A., Salman, U., & Yılmaz, A. S. (2022). The effects of the activity of making jewelry from beads on the anxiety levels of children with Cancer: a Randomised Controlled Study. Journal of Pediatric Hematology/Oncology Nursing, 39(5), 317-325. | This study does not include play therapy but includes a making jewelry from beads based therapeutic play sessions intervention. |
| 4 | Raybin, J. L., et al., 2022 | Quality of Life Outcomes With Creative Arts Therapy in Children With Cancer | Raybin, J. L., Zhou, W., Pan, Z., & Jankowski, C. (2022). Quality of life outcomes with creative arts therapy in children with cancer. Journal of Pediatric Hematology/Oncology Nursing, 39(3), 155-167. | A quasi-experimental study |
| 5 | Gerceker, G. O., et al., 2024 | The Effect of Virtual Reality Distraction and Fatigue Training on Anxiety and Fatigue Levels in Children with Cancer: A Randomized Controlled Study | Gerceker, G. O., Bektas, M., Onal, A., Kudubes, A. A., & Cecen, R. E. (2024). The Effect of Virtual Reality Distraction and Fatigue Training on Anxiety and Fatigue Levels in Children with Cancer: A Randomized Controlled Study. Semin Oncol Nurs, 40(6), 151725. https://doi.org/10.1016/j.soncn.2024.151725 | This study was conducted using virtual reality. |
| 6 | Piasai, K., et al., 2018 | A randomized control trial of guided-imagination and drawing-storytelling in children with cancer | Piasai, K., Phumdoung, S., Wiroonpanich, W., & Chotsampancharoen, T. (2018). A randomized control trial of guided-imagination and drawing-storytelling in children with cancer. Pacific Rim International Journal of Nursing Research, 22(4), 386-400. | In this study, play therapy was applied in a single session. |
| 7 | De Feudis, R. L., et al., 2021 | An art therapy group intervention for cancer patients to counter distress before chemotherapy | De Feudis, R. L., Graziano, G., Lanciano, T., Garofoli, M., Lisi, A., & Marzano, N. (2021). An art therapy group intervention for cancer patients to counter distress before chemotherapy. Arts & Health, 13(1), 35-48. | It is not a randomized controlled study, and it was not conducted with pediatric patients. |
| 8 | Gürcan M, et al., 2021 | The effectiveness of mandala drawing in reducing psychological symptoms, anxiety and depression in hospitalised adolescents with cancer: A randomised controlled trial | Gürcan M, Atay Turan S. The effectiveness of mandala drawing in reducing psychological symptoms, anxiety and depression in hospitalised adolescents with cancer: A randomised controlled trial. Eur J Cancer Care (Engl). 2021;30(6):e13491. doi:10.1111/ecc.13491 | In this study, play therapy was applied in two sessions. |
| 9 | Forutannasab, R., et al., 2024 | The Effect of Happiness Educational Program of Fordyce on the Sense of Coherence and Psychological Well-being of Adolescents with a Parent with Cancer: A Randomized Clinical Trial | Forutannasab, R., Karimi, Z., Zoladl, M., & Afrasiabifar, A. (2024). The Effect of Happiness Educational Program of Fordyce on the Sense of Coherence and Psychological Well-being of Adolescents with a Parent with Cancer: A Randomized Clinical Trial [Article]. International Journal of Community Based Nursing and Midwifery, 12(2), 98-108. https://doi.org/10.30476/ijcbnm.2024.100406.2359 | This study was conducted with parents. |
| 10 | Li J, et al., 2022 | Sandplay therapy could be a method to decrease disease activity and psychological stress in children with systemic lupus erythematosus | Li J, Shi Y, Zhou W. Sandplay therapy could be a method to decrease disease activity and psychological stress in children with systemic lupus erythematosus. Lupus. 2022;31(2):212-220. doi:10.1177/09612033211072398 | This study was not conducted with pediatric cancer patients. |
| 11 | Alavi, B., et al., 2021 | Effectiveness of individual play therapy on hope, adjustment and pain response of children with leukemia hospitalized in Shahrivar Hospital, Rasht, Iran | Alavi, B., Makvandi, B., Asgari, P., & Moradimanesh, F. (2021). Effectiveness of individual play therapy on hope, adjustment and pain response of children with leukemia hospitalized in Shahrivar Hospital, Rasht, Iran. Preventive Care in Nursing & Midwifery Journal, 11(2), 10-21. | A quasi-experimental study |
| 12 | Momeni Gazestan, E., et al., 2021 | The Effect of Group Play Therapy on Anxiety in Children Diagnosed with Leukemia | Momeni Gazestan, E., Heydari, A., Makvandi, B., & Moradimanesh, F. (2021). The Effect of Group Play Therapy on Anxiety in Children Diagnosed with Leukemia. Preventive Care in Nursing & Midwifery Journal, 11(2), 49-55. | A quasi-experimental study |
| 13 | Lozano-Lozano, M., et al., 2023 | Effect of mHealth plus occupational therapy on cognitive function, mood and physical function in people after cancer: secondary analysis of a randomized controlled trial | Lozano-Lozano, M., Galiano-Castillo, N., Gonzalez-Santos, A., Ortiz-Comino, L., Sampedro-Pilegaard, M., Martín-Martín, L., & Arroyo-Morales, M. (2023). Effect of mHealth plus occupational therapy on cognitive function, mood and physical function in people after cancer: Secondary analysis of a randomized controlled trial. Annals of physical and rehabilitation medicine, 66(2), 101681. | This study was not conducted with pediatric cancer patients. |
| 14 | De Feudis, R. L., et al., 2021 | An art therapy group intervention for cancer patients to counter distress before chemotherapy | De Feudis, R. L., Graziano, G., Lanciano, T., Garofoli, M., Lisi, A., & Marzano, N. (2021). An art therapy group intervention for cancer patients to counter distress before chemotherapy. Arts & Health, 13(1), 35-48. | A quasi-experimental study |
| 15 | Kauhanen, L., et al., 2014 | Active video games to promote physical activity in children with cancer: a randomized clinical trial with follow-up | Kauhanen, L., Järvelä, L., Lähteenmäki, P. M., Arola, M., Heinonen, O. J., Axelin, A., ... & Salanterä, S. (2014). Active video games to promote physical activity in children with cancer: a randomized clinical trial with follow-up. BMC pediatrics, 14, 1-10. | This study does not include play therapy but includes a therapeutic play intervention. |
| 16 | Applebaum, A. J., et al., 2022 | A randomized controlled trial of emotion regulation therapy for cancer caregivers: a mechanism-targeted approach to addressing caregiver distress | Applebaum, A. J., Loschiavo, M., Morgan, K., Mennin, D. S., Fresco, D. M., Hoyt, M. A., ... & Jacobs, J. M. (2022). A randomized controlled trial of emotion regulation therapy for cancer caregivers: a mechanism-targeted approach to addressing caregiver distress. Contemporary clinical trials, 122, 106923. | This study was not conducted with pediatric cancer patients. |
| 17 | Holtmaat, K., et al., 2024 | Does enhanced meaning after meaning-centered group psychotherapy mediate a reduction in depressive symptoms in cancer survivors? A mediation analysis in the context of a randomized controlled trial | Holtmaat, K., van der Spek, N., Rijnhart, J. J., Lissenberg-Witte, B., Breitbart, W., Cuijpers, P., & Verdonck-de Leeuw, I. M. (2024). Does enhanced meaning after meaning-centered group psychotherapy mediate a reduction in depressive symptoms in cancer survivors? A mediation analysis in the context of a randomized controlled trial. Supportive Care in Cancer, 32(12), 832. | This study was not conducted with pediatric cancer patients. |
| 18 | Aslan, H., et al., 2022 | The effect of playing games with toys made with medical materials in children with cancer on pain during intravenous treatment | Aslan, H., & Erci, B. (2022). The effect of playing games with toys made with medical materials in children with cancer on pain during intravenous treatment. Palliative & Supportive Care, 20(1), 84-93. | This study does not include play therapy but includes an therapeutic play intervention. |
| 19 | Peng, 2023 | Effectiveness of play therapy in reducing stress and pain among children with cancer at Hospital in Nepal: a randomized control trial | https://www.chictr.org.cn/showproj.html?proj=167707 | This study is not in English, and the full text is not available. |
| 20 | Joly, F., et al., 2022 | Impact of creative art therapy on fatigue and quality of life in patients treated for localized breast cancer: A randomized study | Joly, F., Pasquier, D., Levy, C., Mousseau, M., D’Almeida, M. C., Noal, S., ... & Heutte, N. (2022). Impact of creative art therapy on fatigue and quality of life in patients treated for localized breast cancer: A randomized study. Psycho‐Oncology, 31(8), 1412-1419. | This study was not conducted with pediatric cancer patients. |
| 21 | Thyme, K. E., et al., 2022 | Art therapy and self-image: A 5-year follow-up art therapy RCT study of women diagnosed with breast cancer | Thyme, K. E., Tavelin, B., Öster, I., Lindh, J., & Wiberg, B. (2022). Art therapy and self-image: A 5-year follow-up art therapy RCT study of women diagnosed with breast cancer. Palliative & supportive care, 20(4), 482-490. | This study was not conducted with pediatric cancer patients. |
| 22 | De Feudis, R. L., et al., 2021 | An art therapy group intervention for cancer patients to counter distress before chemotherapy. | De Feudis, R. L., Graziano, G., Lanciano, T., Garofoli, M., Lisi, A., & Marzano, N. (2021). An art therapy group intervention for cancer patients to counter distress before chemotherapy. Arts & Health, 13(1), 35-48. | A quasi-experimental study, In this study, play therapy was applied in a single session. |
| 23 | Elisenda Campreciós Suñol ("Recently published research") | Art Therapy Effectiveness in the Level of Anxiety and Depression of Cancer Patients (ATANDEC) | https://clinicaltrials.gov/study/NCT04936139?tab=results | This study was not conducted with pediatric cancer patients. |
| 24 | Jutakeo, 2025 | Effects of Dharma Creative Art Therapy on Psychological Consequences and Quality of Life in Thai Cancer Patients: A Randomized Controlled Trial | https://trialsearch.who.int/Trial2.aspx?TrialID=TCTR20210401003 | This study is not in English, and the full text is not available. |
| 25 | Hansen, A., et al., 2020 | Effectiveness of physical therapy–and occupational therapy–based rehabilitation in people who have glioma and are undergoing active anticancer treatment: single-blind, randomized controlled trial | Hansen, A., Pedersen, C. B., Jarden, J. O., Beier, D., Minet, L. R., & Søgaard, K. (2020). Effectiveness of physical therapy–and occupational therapy–based rehabilitation in people who have glioma and are undergoing active anticancer treatment: single-blind, randomized controlled trial. Physical therapy, 100(3), 564-574. | This study was not conducted with pediatric cancer patients. |
| 26 | Naveed, A., et al., 2021 | A comparison of group art therapy in decreasing the depression level of leukemia pediatric patients | Naveed, A., & Masood, S. (2021). A comparison of group art therapy in decreasing the depression level of leukemia pediatric patients. European Psychiatry, 64(S1), S432-S432. | In this study, play therapy was applied in three sessions. |
| 27 | Pouraboli, B., 2019 | The effect of relaxation techniques on anxiety, fatigue and sleep quality of parents of children with leukemia under chemotherapy in South East Iran | Pouraboli, B., Poodineh, Z., & Jahani, Y. (2019). The effect of relaxation techniques on anxiety, fatigue and sleep quality of parents of children with leukemia under chemotherapy in South East Iran. Asian Pacific journal of cancer prevention: APJCP, 20(10), 2903. | This study was not conducted with pediatric cancer patients. |
| 28 | Czamanski-Cohen, J., 2019 | The role of emotional processing in art therapy (REPAT) for breast cancer patients | Czamanski-Cohen, J., Wiley, J. F., Sela, N., Caspi, O., & Weihs, K. (2019). The role of emotional processing in art therapy (REPAT) for breast cancer patients. Journal of Psychosocial Oncology, 37(5), 586-598. | This study was not conducted with pediatric cancer patients. |
| 29 | Zhang, A., et al., 2018 | The effectiveness of solution-focused brief therapy for psychological distress among Chinese parents of children with a cancer diagnosis: A pilot randomized controlled trial | Zhang, A., Ji, Q., Currin-McCulloch, J., Solomon, P., Chen, Y., Li, Y., ... & Nowicki, J. (2018). The effectiveness of solution-focused brief therapy for psychological distress among Chinese parents of children with a cancer diagnosis: A pilot randomized controlled trial. Supportive Care in Cancer, 26, 2901-2910. | This study was not conducted with pediatric cancer patients. |
| 30 | Jo, M. J., et al., 2018 | Effects of art intervention program for siblings of children with cancer: a pilot study | Jo, M. J., Hong, S., & Park, H. R. (2018). Effects of art intervention program for siblings of children with cancer: a pilot study. Journal of Pediatric Oncology Nursing, 35(3), 178-187. | This study was not conducted with pediatric cancer patients. |
| 31 | Abdulah, D. M., et al., 2018 | Effectiveness of group art therapy on quality of life in paediatric patients with cancer: A randomized controlled trial | Abdulah, D. M., & Abdulla, B. M. O. (2018). Effectiveness of group art therapy on quality of life in paediatric patients with cancer: A randomized controlled trial. Complementary therapies in medicine, 41, 180-185. | In this study, no feedback was given to the children after the art therapy. |
| 32 | Radl, D., et al., 2018 | The effects of Self‐Book© art therapy on cancer‐related distress in female cancer patients during active treatment: A randomized controlled trial | Radl, D., Vita, M., Gerber, N., Gracely, E. J., & Bradt, J. (2018). The effects of Self‐Book© art therapy on cancer‐related distress in female cancer patients during active treatment: A randomized controlled trial. *Psycho‐Oncology*, *27*(9), 2087-2095. | This study was not conducted with pediatric cancer patients. |
| 33 | Day, M., et al., 2021 | The efficacy of interactive group psychoeducation for children with leukaemia: A randomised controlled trial | Day, M., Harris, S., Hussein, D., Saka, M. Y., Stride, C., Jones, M., Makin, G., & Rowe, R. (2021). The efficacy of interactive group psychoeducation for children with leukaemia: A randomised controlled trial [Article]. Patient Education and Counseling, 104(12), 3008-3015. https://doi.org/10.1016/j.pec.2021.04.015 | This study does not involve a therapeutic intervention but examines the effectiveness of an education-focused program. |
| 34 | Hamedi, V., et al., 2020 | Effectiveness of Conventional Cognitive-Behavioral Therapy and Its Computerized Version on Reduction in Pain Intensity, Depression, Anger, and Anxiety in Children with Cancer: A Randomized, Controlled Trial | Hamedi, V., Hamid, N., Beshlideh, K., Marashi, S. A., & Sheikh Shabani, S. E. H. (2020). Effectiveness of Conventional Cognitive-Behavioral Therapy and Its Computerized Version on Reduction in Pain Intensity, Depression, Anger, and Anxiety in Children with Cancer: A Randomized, Controlled Trial [Article]. Iranian Journal of Psychiatry and Behavioral Sciences, 14(4), Article 83110. https://doi.org/10.5812/ijpbs.83110 | This study does not include play therapy but includes Conventional Cognitive-Behavioral Therapy. |
| 35 | Kang, K. A., et al., 2024 | Effectiveness of a healthy lifestyle program based on a mobile serious game for childhood cancer survivors: A quasi-randomized trial | Kang, K. A., Kim, H. H., Kim, S. J., Song, I. H., Lee, M. J., Lee, S. Y., Han, S. R., Lee, K. H., Kim, S. W., Nam, H. R., Park, M. N., Lee, H. M., & Yoon, H. J. (2024). Effectiveness of a healthy lifestyle program based on a mobile serious game for childhood cancer survivors: A quasi-randomized trial. J Pediatr Nurs, 77, 35-44. https://doi.org/10.1016/j.pedn.2024.03.006 | A quasi-randomized trial |
| 36 | Kaushal, T., et al., 2022 | A parent–child conjoint psychological intervention for children in maintenance phase of acute lymphoblastic leukemia: Feasibility and preliminary outcomes from a randomized control pilot trial | Kaushal, T., Satapathy, S., Bakhshi, S., Sagar, R., & Chadda, R. K. (2022). A parent–child conjoint psychological intervention for children in maintenance phase of acute lymphoblastic leukemia: Feasibility and preliminary outcomes from a randomized control pilot trial [Article]. Archives de Pediatrie, 29(2), 145-152. https://doi.org/10.1016/j.arcped.2021.11.004 | A feasibility study |
| 37 | Li, J., et al., 2022 | Sandplay therapy could be a method to decrease disease activity and psychological stress in children with systemic lupus erythematosus | Li, J., Shi, Y., & Zhou, W. (2022). Sandplay therapy could be a method to decrease disease activity and psychological stress in children with systemic lupus erythematosus [Article]. Lupus, 31(2), 212-220. https://doi.org/10.1177/09612033211072398 | In this study, pediatric patients with cancer were not included. |
| 38 | Piasai, K., et al., 2018 | A Randomized Control Trial of Guided-Imagination and Drawing-Storytelling in Children with Cancer | Piasai, K., Phumdoung, S., Wiroonpanich, W., & Chotsampancharoen, T. (2018). A Randomized Control Trial of Guided-Imagination and Drawing-Storytelling in Children with Cancer [Article]. Pacific Rim International Journal of Nursing Research, 22(4), 386-400. https://search.ebscohost.com/login.aspx?direct=true&db=obo&AN=132186441&lang=tr&site=ehost-live | This study does not include play therapy but includes two-time therapeutic play intervention. |
| 39 | Safarabadi-Farahani, A., et al., 20216 | Effectiveness of a Brief Psychosocial Intervention on Quality of Life of Primary Caregivers of Iranian Children With Cancer: A Randomized Controlled Trial | Safarabadi-Farahani, A., Maarefvand, M., Biglarian, A., & Khubchandani, J. (2016). Effectiveness of a Brief Psychosocial Intervention on Quality of Life of Primary Caregivers of Iranian Children With Cancer: A Randomized Controlled Trial. Journal of pediatric nursing, 31(4), e262-e270. https://doi.org/10.1016/j.pedn.2016.01.002 | This study was conducted with caregivers of children with cancer. |
| 40 | Shoshani, A., et al., 2016 | The effects of the Make a Wish intervention on psychiatric symptoms and health-related quality of life of children with cancer: a randomised controlled trial | Shoshani, A., Mifano, K., & Czamanski-Cohen, J. (2016). The effects of the Make a Wish intervention on psychiatric symptoms and health-related quality of life of children with cancer: a randomised controlled trial. Quality of Life Research, 25, 1209-1218. | This study does not include play therapy but includes a therapeutic play intervention. |
| 41 | Siegel, J., et al., 2016 | Expressive Arts Therapy with Hospitalized Children: A Pilot Study of Co-Creating Healing Sock Creatures | Siegel, J., Iida, H., Rachlin, K., & Yount, G. (2016). Expressive Arts Therapy with Hospitalized Children: A Pilot Study of Co-Creating Healing Sock Creatures(c). J Pediatr Nurs, 31(1), 92-98. https://doi.org/10.1016/j.pedn.2015.08.006 | This study does not include play therapy but includes a therapeutic play intervention. A pilot study |
