# Supplementary material for: The Effectiveness of Play Therapy on Anxiety, Pain, and Fatigue in Children with Cancer: A Systematic Review and Meta-Analysis
Source: Research Square preprint supplement (doi:10.21203/rs.3.rs-6762495/v1), 2025-08-25
Supplement: Supplementary file 2 [file f5c02dc76eee719b99556f75.docx]

| **Main Concept** | **#** | **Research strategy** |
| --- | --- | --- |
| A  (Population) | **#1** | TITLE-ABS-KEY (‘cancer’ OR ‘chemotherapy’ OR ‘child’ OR ‘hematology’ OR ‘osteosarcome’ OR ‘leukemia’) |
| B  (Intervention) | **#2** | TITLE-ABS-KEY ('art therapy' OR ‘drawing’ OR ‘filial therapy’ OR ‘occupational therapy’ OR ‘play-based’ OR 'play therapy') |
| C  (Outcomes) | **#3** | TITLE-ABS-KEY ('anxiety' OR ‘depression’ OR 'fatigue' OR 'pain' OR ‘stress’ OR ‘symptoms’) |
| D  (Study Type) | **#4** | TITLE-ABS-KEY ('controlled clinical trial' OR 'randomized controlled trial') |
| **Limitations: (Language [English] AND publication years [2014.01.01-2024.12.31])**  **1 AND 2 AND 3 AND 4**  (‘cancer’ OR ‘chemotherapy’ OR ‘child’ OR ‘hematology’ OR ‘osteosarcome’ OR ‘leukemia’) AND ('art therapy' OR ‘drawing’ OR ‘filial therapy’ OR ‘occupational therapy’ OR ‘play-based’ OR 'play therapy') AND ('anxiety' OR ‘depression’ OR 'fatigue' OR 'pain' OR ‘stress’ OR ‘symptoms’) AND ('controlled clinical trial' OR 'randomized controlled trial')  **Combined search results: 1.613** | | |

**Cochrane (March 15th, 2025)**

**
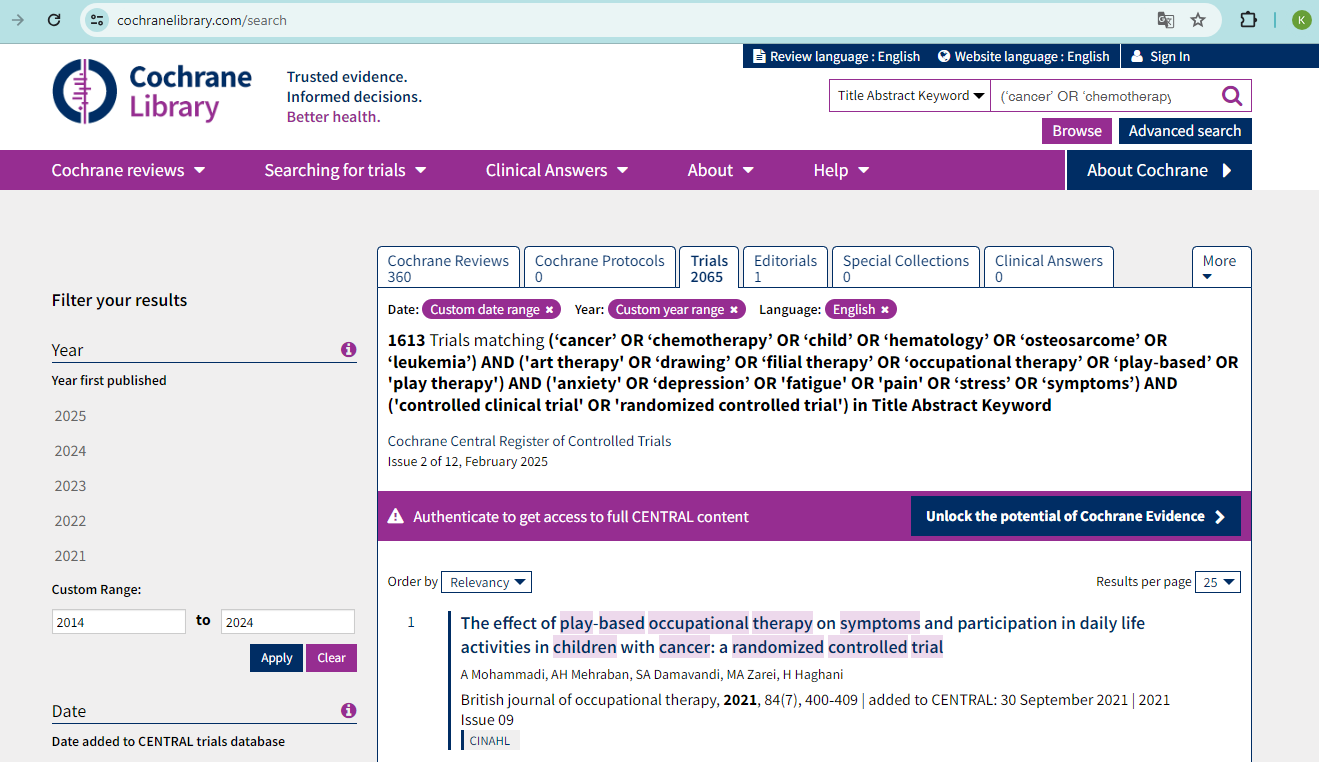
**

**MEDLINE (March 15th, 2025)**

| **Main Concept** | **#** | **Research strategy** |
| --- | --- | --- |
| A  (Population) | **#1** | MM (‘cancer’ OR ‘chemotherapy’ OR ‘child’ OR ‘hematology’ OR ‘osteosarcome’ OR ‘leukemia’) OR AB (‘cancer’ OR ‘chemotherapy’ OR ‘child’ OR ‘hematology’ OR ‘osteosarcome’ OR ‘leukemia’) OR TI (‘cancer’ OR ‘chemotherapy’ OR ‘child’ OR ‘hematology’ OR ‘osteosarcome’ OR ‘leukemia’) |
| B  (Intervention) | **#2** | MM ('art therapy' OR ‘drawing’ OR ‘filial therapy’ OR ‘occupational therapy’ OR ‘play-based’ OR 'play therapy') OR AB ('art therapy' OR ‘drawing’ OR ‘filial therapy’ OR ‘occupational therapy’ OR ‘play-based’ OR 'play therapy') OR TI ('art therapy' OR ‘drawing’ OR ‘filial therapy’ OR ‘occupational therapy’ OR ‘play-based’ OR 'play therapy') |
| C  (Outcomes) | **#3** | MM ('anxiety' OR ‘depression’ OR 'fatigue' OR 'pain' OR ‘stress’ OR ‘symptoms’) OR AB ('anxiety' OR ‘depression’ OR 'fatigue' OR 'pain' OR ‘stress’ OR ‘symptoms’) OR TI ('anxiety' OR ‘depression’ OR 'fatigue' OR 'pain' OR ‘stress’ OR ‘symptoms’) |
| D  (Study Type) | **#4** | MM ("randomized controlled trial" OR PT ("controlled clinical trial" OR "randomized controlled trial") OR TI ("controlled clinical trial" OR "randomized controlled trial") OR AB ("controlled clinical trial" OR "randomized controlled trial") |
| **Limitations: -**  **1 AND 2 AND 3 AND 4**  ( MM (‘cancer’ OR ‘chemotherapy’ OR ‘child’ OR ‘hematology’ OR ‘osteosarcome’ OR ‘leukemia’) OR AB (‘cancer’ OR ‘chemotherapy’ OR ‘child’ OR ‘hematology’ OR ‘osteosarcome’ OR ‘leukemia’) OR TI (‘cancer’ OR ‘chemotherapy’ OR ‘child’ OR ‘hematology’ OR ‘osteosarcome’ OR ‘leukemia’)) AND ( MM ('art therapy' OR ‘drawing’ OR ‘filial therapy’ OR ‘occupational therapy’ OR ‘play-based’ OR 'play therapy') OR AB ('art therapy' OR ‘drawing’ OR ‘filial therapy’ OR ‘occupational therapy’ OR ‘play-based’ OR 'play therapy') OR TI ('art therapy' OR ‘drawing’ OR ‘filial therapy’ OR ‘occupational therapy’ OR ‘play-based’ OR 'play therapy')) AND ( MM ('anxiety' OR ‘depression’ OR 'fatigue' OR 'pain' OR ‘stress’ OR ‘symptoms’) OR AB ('anxiety' OR ‘depression’ OR 'fatigue' OR 'pain' OR ‘stress’ OR ‘symptoms’) OR TI ('anxiety' OR ‘depression’ OR 'fatigue' OR 'pain' OR ‘stress’ OR ‘symptoms’)) AND ( MM ("randomized controlled trial" OR PT ("controlled clinical trial" OR "randomized controlled trial") OR TI ("controlled clinical trial" OR "randomized controlled trial") OR AB ("controlled clinical trial" OR "randomized controlled trial"))  **Combined search results: 287** | | |

**
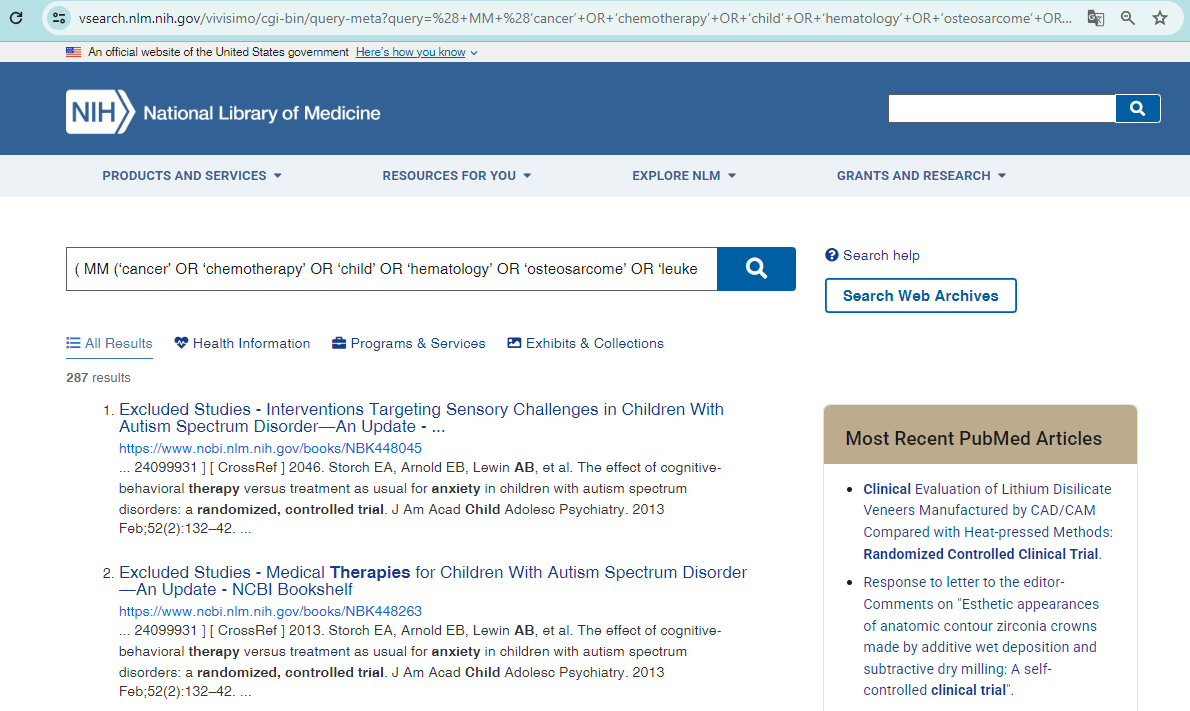
**

| **Main Concept** | **#** | **Research strategy** |
| --- | --- | --- |
| A  (Population) | **#1** | (Title/Abstract (‘cancer’ OR ‘chemotherapy’ OR ‘child’ OR ‘hematology’ OR ‘osteosarcome’ OR ‘leukemia’)) |
| B  (Intervention) | **#2** | (Title/Abstract ('art therapy' OR ‘drawing’ OR ‘filial therapy’ OR ‘occupational therapy’ OR ‘play-based’ OR 'play therapy')) |
| C  (Outcomes) | **#3** | ((Title/Abstract ('anxiety' OR ‘depression’ OR 'fatigue' OR 'pain' OR ‘stress’ OR ‘symptoms’)) |
| D  (Study Type) | **#4** | ("randomized controlled trial"[Publication Type]) |
| **Limitations: (Language [English] AND publication years [2014.01.01-2024.12.31] publication type [Scholarly Journals])**  **1 AND 2 AND 3 AND 4**  (Title/Abstract ("cancer" OR "chemotherapy" OR "child" OR "hematology" OR "osteosarcoma" OR "leukemia")) AND (Title/Abstract ("art therapy" OR "drawing" OR "filial therapy" OR "occupational therapy" OR "play-based" OR "play therapy")) AND (Title/Abstract ("anxiety" OR "depression" OR "fatigue" OR "pain" OR "stress" OR "symptoms")) AND ("randomized controlled trial"[Publication Type])  **Combined search results: 434** | | |

**Proquest (March 15th, 2025)**


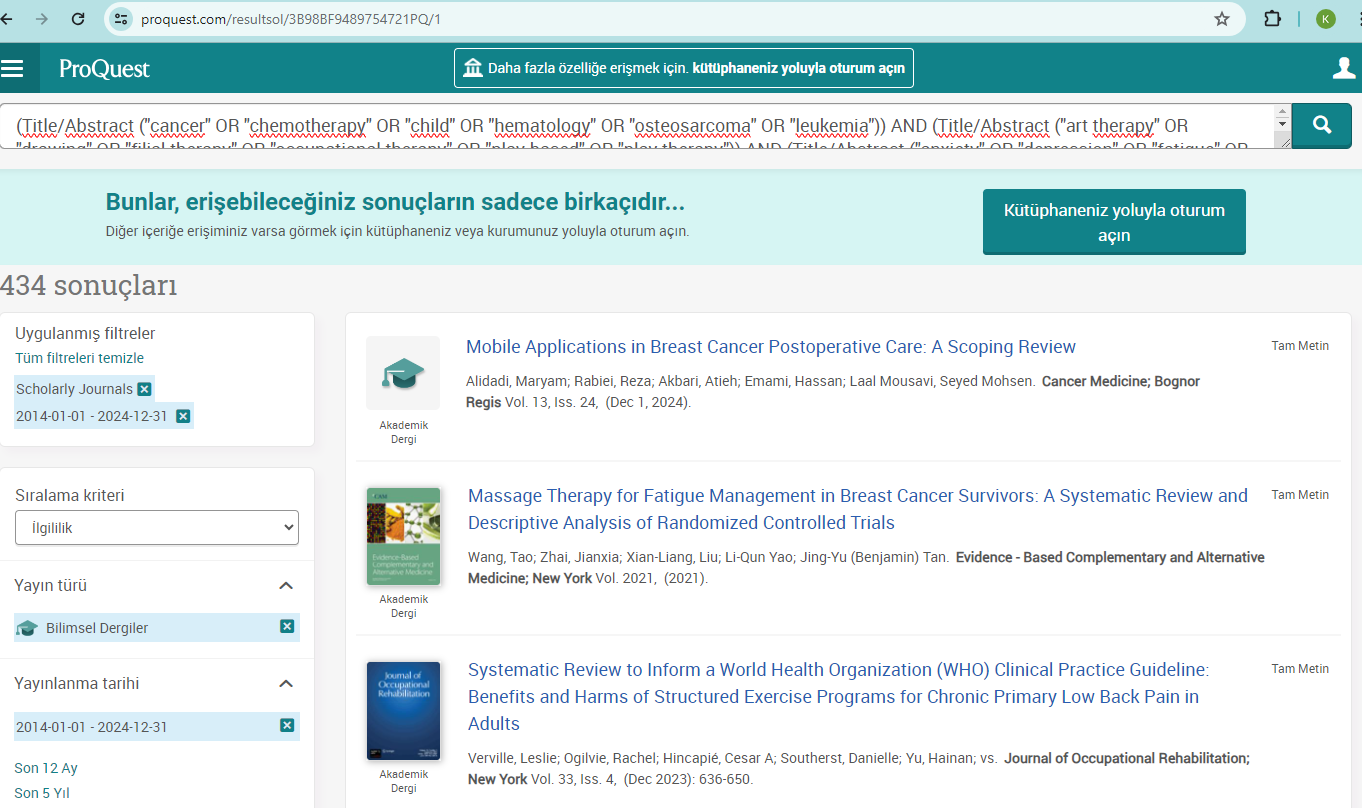


**PubMED (March 15th, 2025)**

| **Main Concept** | **#** | **Research strategy** |
| --- | --- | --- |
| A  (Population) | **#1** | ("cancer"[Title/Abstract] OR "chemotherapy"[Title/Abstract] OR "child"[Title/Abstract] OR "hematology"[Title/Abstract] OR "osteosarcoma"[MeSH Terms] OR "leukemia"[MeSH Terms]) |
| B  (Intervention) | **#2** | ("art therapy"[MeSH Terms] OR "drawing"[Title/Abstract] OR "filial therapy"[Title/Abstract] OR "play-based"[Title/Abstract] OR "play therapy"[MeSH Terms] OR "occupational therapy"[Title/Abstract]) |
| C  (Outcomes) | **#3** | ("anxiety"[Title/Abstract] OR "depression"[Title/Abstract] OR "fatigue"[MeSH Terms] OR "pain"[MeSH Terms] OR "stress"[MeSH Terms] OR "symptoms"[Title/Abstract]) |
| D  (Study Type) | **#4** | ("randomized controlled trial"[Publication Type] OR "randomized controlled trial"[Title/Abstract] OR "controlled clinical trial"[Title/Abstract]) |
| **Limitations: (Language [English] AND** **publication years [2014.01.01-2024.12.31] article type [Randomized Controlled Trial])**  **1 AND 2 AND 3 AND 4**  ("cancer"[Title/Abstract] OR "chemotherapy"[Title/Abstract] OR "child"[Title/Abstract] OR "hematology"[Title/Abstract] OR "osteosarcoma"[MeSH Terms] OR "leukemia"[MeSH Terms]) AND ("art therapy"[MeSH Terms] OR "drawing"[Title/Abstract] OR "filial therapy"[Title/Abstract] OR "play-based"[Title/Abstract] OR "play therapy"[MeSH Terms] OR "occupational therapy"[Title/Abstract]) AND ("anxiety"[Title/Abstract] OR "depression"[Title/Abstract] OR "fatigue"[MeSH Terms] OR "pain"[MeSH Terms] OR "stress"[MeSH Terms] OR "symptoms"[Title/Abstract]) AND ("randomized controlled trial"[Publication Type] OR "randomized controlled trial"[Title/Abstract] OR "controlled clinical trial"[Title/Abstract])  **Combined search results: 41** | | |

**
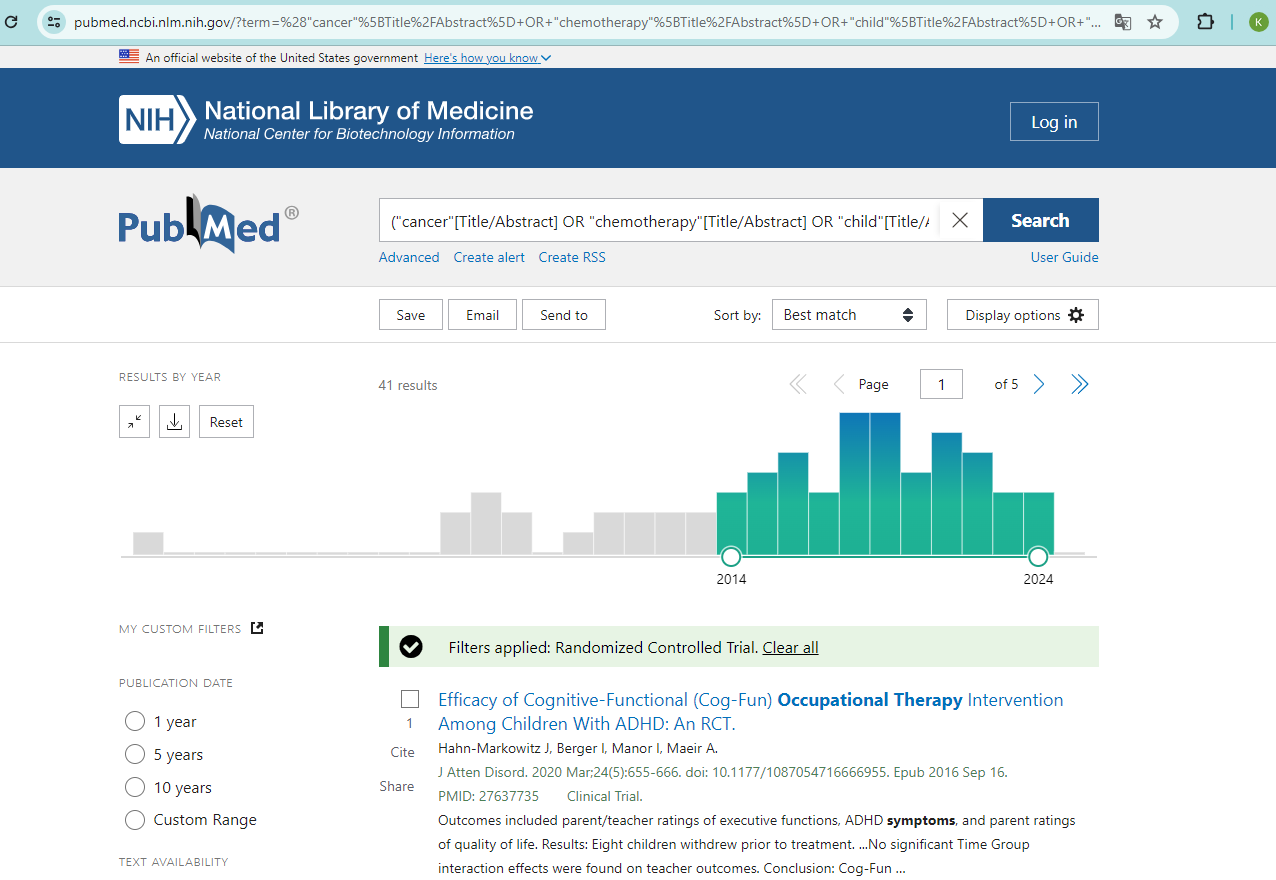
**

**Scopus (March 15th, 2025)**

| **Main Concept** | **#** | **Research strategy** |
| --- | --- | --- |
| A  (Population) | **#1** | TITLE-ABS-KEY (‘cancer’ OR ‘chemotherapy’ OR ‘child’ OR ‘hematology’ OR ‘osteosarcome’ OR ‘leukemia’) |
| B  (Intervention) | **#2** | TITLE-ABS-KEY ('art therapy' OR ‘drawing’ OR ‘filial therapy’ OR ‘occupational therapy’ OR ‘play-based’ OR 'play therapy') |
| C  (Outcomes) | **#3** | TITLE-ABS-KEY ('anxiety' OR ‘depression’ OR 'fatigue' OR 'pain' OR ‘stress’ OR ‘symptoms’) |
| D  (Study Type) | **#4** | TITLE-ABS-KEY ('controlled clinical trial' OR 'randomized controlled trial') |
| **Limitations: (Language [English] AND publication years [2014-2024] AND document type [Article])**  **1 AND 2 AND 3 AND 4**  (‘cancer’ OR ‘chemotherapy’ OR ‘child’ OR ‘hematology’ OR ‘osteosarcome’ OR ‘leukemia’) AND ('art therapy' OR ‘drawing’ OR ‘filial therapy’ OR ‘occupational therapy’ OR ‘play-based’ OR 'play therapy') AND ('anxiety' OR ‘depression’ OR 'fatigue' OR 'pain' OR ‘stress’ OR ‘symptoms’) AND ('controlled clinical trial' OR 'randomized controlled trial')  **Combined search results: 176** | | |

**
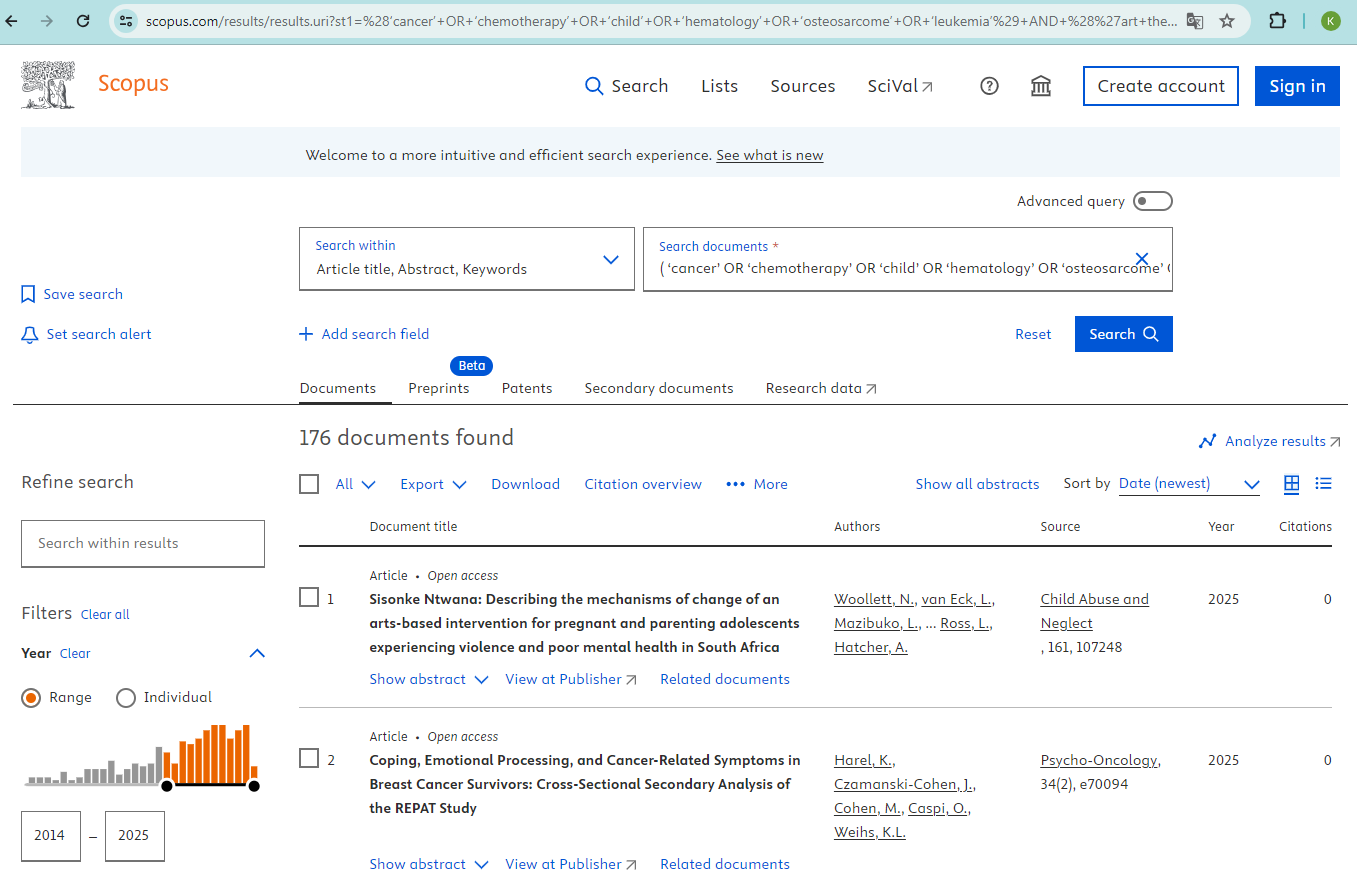
**

**Web Of Science (March 15th, 2025)**

| **Main Concept** | **#** | **Research strategy** |
| --- | --- | --- |
| A  (Population) | **#1** | (‘cancer’ OR ‘chemotherapy’ OR ‘child’ OR ‘hematology’ OR ‘osteosarcome’ OR ‘leukemia’) |
| B  (Intervention) | **#2** | ('art therapy' OR ‘drawing’ OR ‘filial therapy’ OR ‘occupational therapy’ OR ‘play-based’ OR 'play therapy') |
| C  (Outcomes) | **#3** | ('anxiety' OR ‘depression’ OR 'fatigue' OR 'pain' OR ‘stress’ OR ‘symptoms’) |
| D  (Study Type) | **#4** | ('controlled clinical trial' OR 'randomized controlled trial') |
| **Limitations: (Language [English] AND publication years [2014.01.01-2024.12.31] document types [Article-Nor Review Article])**  **1 AND 2 AND 3 AND 4**  (‘cancer’ OR ‘chemotherapy’ OR ‘child’ OR ‘hematology’ OR ‘osteosarcome’ OR ‘leukemia’) AND ('art therapy' OR ‘drawing’ OR ‘filial therapy’ OR ‘occupational therapy’ OR ‘play-based’ OR 'play therapy') AND ('anxiety' OR ‘depression’ OR 'fatigue' OR 'pain' OR ‘stress’ OR ‘symptoms’) AND ('controlled clinical trial' OR 'randomized controlled trial')  **Combined search results: 993** | | |

**
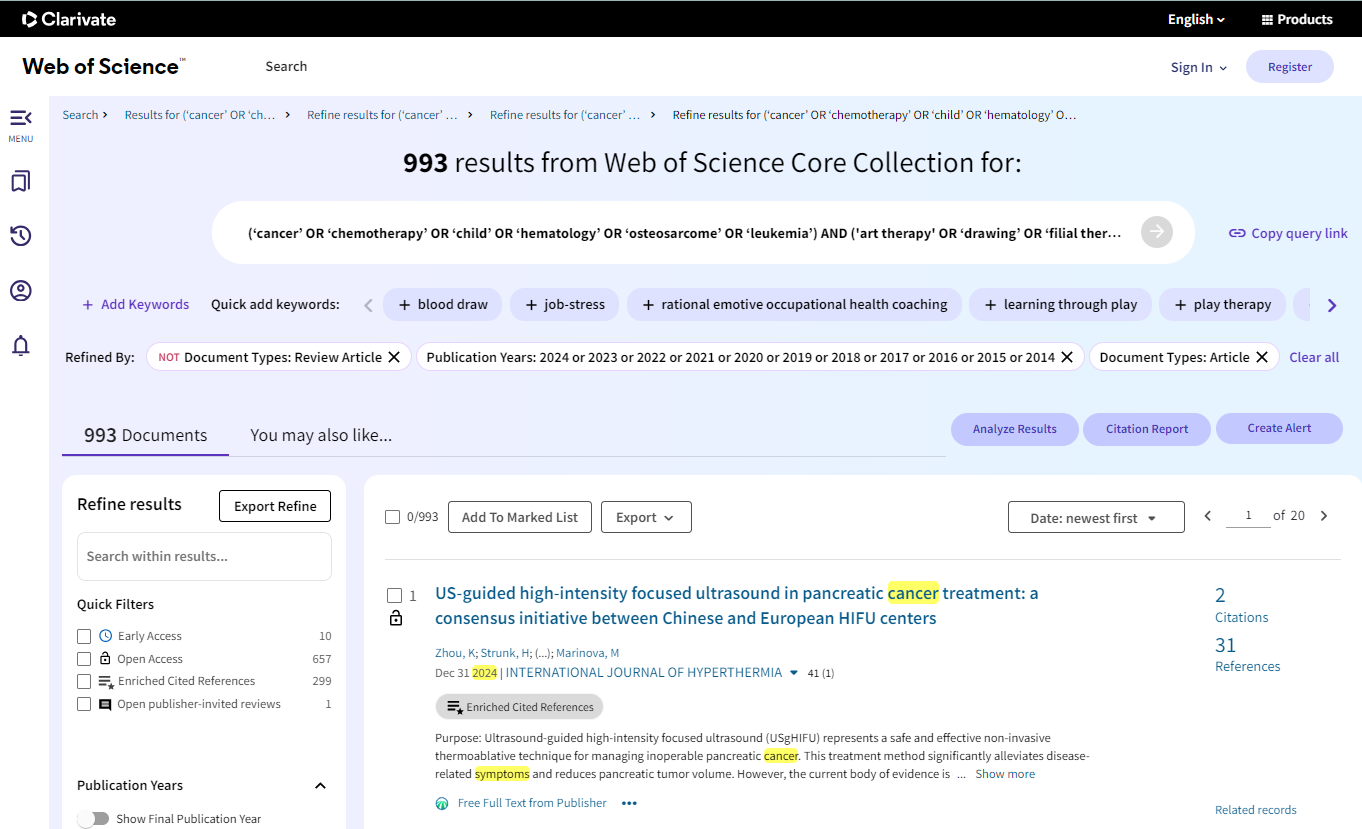
**
